# Supplementary material for: In vivo Visualization of Pig Vagus Nerve “Vagotopy” Using Ultrasound
Source: PubMed Central journal article supplement (PMC8660563; doi:10.3389/fnins.2021.676680), 2021-11-25
Supplement: Image_1.pdf [file Image_1.pdf]

Figure Caption for Video 1.mp4:  
**3D Ultrasound of Cadaver Subject 1**

Figure Caption for Video 2.mp4:  
**3D Ultrasound of Cadaver Subject 2**

Figure Caption for Video 3.mp4:  
**3D Ultrasound of Cadaver Subject 3**

Figure Caption for Video 4.mp4:  
**3D Ultrasound of Live Subject 1**

Figure Caption for Video 5.mp4:  
**3D Ultrasound of Live Subject 2**

Figure Caption for Video 6.mp4:  
**3D Ultrasound of Live Subject 3**

Figure Caption for Video 7.mp4:  
**Subject 1 Test Ultrasound Video**

Figure Caption for Video 8.mp4:  
**Subject 2 Test Ultrasound Video**

Figure Caption for Video 9.mp4:  
**Subject 3 Test Ultrasound Video**

Figure Caption for Video 10.mp4:  
**Subject 1 Tutorial Ultrasound Video**

Figure Caption for Video 11.mp4:  
**Subject 3 Tutorial Ultrasound Video**

Figure Caption for Video 12.mp4:  
**Subject 2 Tutorial Ultrasound Video**
